# Supplementary material
Source: ML conference proceedings conference paper supplement (https://proceedings.neurips.cc/paper_files/paper/2019/hash/873be0705c80679f2c71fbf4d872df59-Abstract.html)
Supplement: Supplementary file [file 873be0705c80679f2c71fbf4d872df59-Supplemental.zip]

# Supplementary Material For: Reinforcement Learning with Convex Constraints

## A Online gradient descent (OGD)

---

**Algorithm 3** Online gradient descent (OGD)

---

```

1: input: projection oracle  $\Gamma_\Lambda$   $\{\Gamma_\Lambda(\lambda) = \operatorname{argmin}_{\lambda' \in \Lambda} \|\lambda - \lambda'\|\}$ 
2: init:  $\lambda_1$  arbitrarily
3: parameters: step size  $\eta_t$ 
4: for  $t = 1$  to  $T$  do
5:   observe convex loss function  $\ell_t : \Lambda \rightarrow \mathbb{R}$ 
6:    $\lambda'_{t+1} = \lambda_t - \eta_t \nabla \ell_t(\lambda_t)$ 
7:    $\lambda_{t+1} = \Gamma_\Lambda(\lambda'_{t+1})$ 
8: end for

```

---

**Theorem A.1.** (Zinkevich, 2003) Assume that for any  $\lambda, \lambda' \in \Lambda$  we have  $\|\lambda - \lambda'\| \leq D$  and also  $\|\nabla \ell_t(\lambda)\| \leq G$ . Let  $\eta_t = \eta = \frac{D}{G\sqrt{T}}$ . Then the regret of OGD is

$$\operatorname{Regret}_T(\text{OGD}) = \sum_{t=1}^T \ell_t(\lambda_t) - \min_{\lambda} \sum_{t=1}^T \ell_t(\lambda) \leq DG\sqrt{T}.$$

## B Proof of Theorem 3.1

We have that

$$\frac{1}{T} \sum_{t=1}^T g(\lambda_t, \mathbf{u}_t) = \frac{1}{T} \sum_{t=1}^T \min_{\mathbf{u} \in \mathcal{U}} g(\lambda_t, \mathbf{u}) \quad (21)$$

$$\leq \frac{1}{T} \min_{\mathbf{u} \in \mathcal{U}} \sum_{t=1}^T g(\lambda_t, \mathbf{u}) \quad (22)$$

$$\leq \min_{\mathbf{u} \in \mathcal{U}} g\left(\frac{1}{T} \sum_{t=1}^T \lambda_t, \mathbf{u}\right) \quad (23)$$

$$\leq \max_{\lambda \in \Lambda} \min_{\mathbf{u} \in \mathcal{U}} g(\lambda, \mathbf{u}). \quad (24)$$

Eq. (21) is because the  $\mathbf{u}$ -player is playing best response so that  $\mathbf{u}_t = \operatorname{argmin}_{\mathbf{u} \in \mathcal{U}} g(\lambda_t, \mathbf{u})$ . Eq. (22) is because taking the minimum of each term of a sum cannot exceed the minimum of the sum as a whole. Eqs. (23) and (24) use the concavity of  $g$  with respect to  $\lambda$ , and the definition of max, respectively. By letting  $\delta = \frac{1}{T} \operatorname{Regret}_T$ , writing the definition of regret for the  $\lambda$ -player, and using  $\ell_t(\lambda) = -g(\lambda, \mathbf{u}_t)$ , we have

$$\frac{1}{T} \sum_{t=1}^T g(\lambda_t, \mathbf{u}_t) + \delta = \frac{1}{T} \max_{\lambda \in \Lambda} \sum_{t=1}^T g(\lambda, \mathbf{u}_t) \geq \max_{\lambda \in \Lambda} g\left(\lambda, \frac{1}{T} \sum_{t=1}^T \mathbf{u}_t\right) \geq \min_{\mathbf{u} \in \mathcal{U}} \max_{\lambda \in \Lambda} g(\lambda, \mathbf{u}),$$

where the second and third inequalities use convexity of  $g$  with respect to  $\mathbf{u}$  and definition of min, respectively. Combining yields

$$\min_{\mathbf{u} \in \mathcal{U}} g\left(\frac{1}{T} \sum_{t=1}^T \lambda_t, \mathbf{u}\right) \geq \min_{\mathbf{u} \in \mathcal{U}} \max_{\lambda \in \Lambda} g(\lambda, \mathbf{u}) - \delta,$$

and also

$$\max_{\lambda \in \Lambda} g\left(\lambda, \frac{1}{T} \sum_{t=1}^T \mathbf{u}_t\right) \leq \max_{\lambda \in \Lambda} \min_{\mathbf{u} \in \mathcal{U}} g(\lambda, \mathbf{u}) + \delta,$$

completing the proof.

## C Proof of Theorem 3.3

Let  $v$  be the value of the game in Eq. (7):

$$v = \min_{\mu \in \Delta(\Pi)} \text{dist}(\bar{\mathbf{z}}(\mu), \mathcal{C}), \quad (25)$$

and let  $\ell_t(\boldsymbol{\lambda}) = -\boldsymbol{\lambda} \cdot \hat{\mathbf{z}}_t$  (i.e., the loss function that OGD observes).

**Lemma C.1.** For  $t = 1, 2, \dots, T$  we have

$$\ell_t(\boldsymbol{\lambda}_t) = -\boldsymbol{\lambda}_t \cdot \hat{\mathbf{z}}_t \geq -v - (\epsilon_0 + \epsilon_1).$$

*Proof.* By Eq. (5) (which must hold by Lemma 3.2), and by Eq. (25), there exists  $\mu^* \in \Delta(\Pi)$  such that

$$v = \text{dist}(\bar{\mathbf{z}}(\mu^*), \mathcal{C}) = \max_{\boldsymbol{\lambda} \in \Lambda} \boldsymbol{\lambda} \cdot \bar{\mathbf{z}}(\mu^*).$$

Thus,  $\boldsymbol{\lambda}_t \cdot \bar{\mathbf{z}}(\mu^*) \leq v$  since  $\boldsymbol{\lambda}_t \in \Lambda$  for all  $t$ . By our assumed guarantee for the policy  $\pi_t$  returned by the planning oracle, we have

$$-\boldsymbol{\lambda}_t \cdot \bar{\mathbf{z}}(\pi_t) \geq -\boldsymbol{\lambda}_t \cdot \bar{\mathbf{z}}(\mu^*) - \epsilon_0 \geq -v - \epsilon_0.$$

Now using the error bound of the estimation oracle,

$$\|\bar{\mathbf{z}}(\pi_t) - \hat{\mathbf{z}}_t\| \leq \epsilon_1, \quad (26)$$

and the fact that  $\|\boldsymbol{\lambda}_t\| \leq 1$ , we have

$$(-\boldsymbol{\lambda}_t \cdot \hat{\mathbf{z}}_t) + \epsilon_1 \geq -\boldsymbol{\lambda}_t \cdot \bar{\mathbf{z}}(\pi_t).$$

Combining completes the proof.  $\square$

Now we are ready to prove Theorem 3.3. Using the definition of mixed policy  $\bar{\mu}$  returned by the algorithm we have

$$\begin{aligned} \text{dist}(\bar{\mathbf{z}}(\bar{\mu}), \mathcal{C}) &= \text{dist}\left(\frac{1}{T} \sum_{t=1}^T \bar{\mathbf{z}}(\pi_t), \mathcal{C}\right) \\ &= \max_{\boldsymbol{\lambda} \in \Lambda} \boldsymbol{\lambda} \cdot \left(\frac{1}{T} \sum_{t=1}^T \bar{\mathbf{z}}(\pi_t)\right) \end{aligned} \quad (27)$$

$$\begin{aligned} &= \frac{1}{T} \max_{\boldsymbol{\lambda} \in \Lambda} \sum_{t=1}^T \boldsymbol{\lambda} \cdot \bar{\mathbf{z}}(\pi_t) \\ &\leq \frac{1}{T} \max_{\boldsymbol{\lambda} \in \Lambda} \sum_{t=1}^T \boldsymbol{\lambda} \cdot \hat{\mathbf{z}}_t + \epsilon_1 \end{aligned} \quad (28)$$

$$= -\frac{1}{T} \min_{\boldsymbol{\lambda} \in \Lambda} \sum_{t=1}^T \ell_t(\boldsymbol{\lambda}) + \epsilon_1 \quad (29)$$

$$\leq -\frac{1}{T} \min_{\boldsymbol{\lambda} \in \Lambda} \sum_{t=1}^T \ell_t(\boldsymbol{\lambda}) + \epsilon_1 + \frac{1}{T} \sum_{t=1}^T (\ell_t(\boldsymbol{\lambda}_t) + \epsilon_1 + \epsilon_0 + v) \quad (30)$$

$$\begin{aligned} &= v + \left(-\frac{1}{T} \min_{\boldsymbol{\lambda} \in \Lambda} \sum_{t=1}^T \ell_t(\boldsymbol{\lambda}) + \frac{1}{T} \sum_{t=1}^T \ell_t(\boldsymbol{\lambda}_t)\right) + 2\epsilon_1 + \epsilon_0 \\ &= v + \frac{\text{Regret}_T(\text{OGD})}{T} + 2\epsilon_1 + \epsilon_0. \end{aligned}$$

Here, Eq. (27) is by Eq. (5). Eq. (28) uses Eq. (26) and the fact that  $\|\boldsymbol{\lambda}\| \leq 1$ . Eq. (31) uses Lemma C.1.

The diameter of decision set  $\Lambda = \mathcal{C}^\circ \cap \mathcal{B}$  is at most 1. The gradient of the loss function  $\nabla(\ell_t(\boldsymbol{\lambda})) = -\hat{\mathbf{z}}_t$  has norm at most  $\|\bar{\mathbf{z}}(\pi_t)\| + \epsilon_1 \leq \frac{B}{1-\gamma} + \epsilon_1$ . Therefore, setting  $\eta = \left(\left(\frac{B}{1-\gamma} + \epsilon_1\right)\sqrt{T}\right)^{-1}$  based on Theorem A.1, we get

$$\frac{\text{Regret}_T(\text{OGD})}{T} \leq \left(\frac{B}{1-\gamma} + \epsilon_1\right) T^{-1/2}$$

## D APPROPO for feasibility

---

### Algorithm 4 APPROPO – Feasibility

---

```

1: input projection oracle  $\Gamma_{\mathcal{C}}(\cdot)$  for target set  $\mathcal{C}$  which is a convex cone,
   positive response oracle  $\text{PosPlan}(\cdot)$ , estimation oracle  $\text{Est}(\cdot)$ ,
   step size  $\eta$ , number of iterations  $T$ 
2: define  $\Lambda \triangleq \mathcal{C}^\circ \cap \mathcal{B}$ , and its projection operator  $\Gamma_{\Lambda}(\mathbf{x}) \triangleq (\mathbf{x} - \Gamma_{\mathcal{C}}(\mathbf{x})) / \max\{1, \|\mathbf{x} - \Gamma_{\mathcal{C}}(\mathbf{x})\|\}$ 
3: initialize  $\lambda_1$  arbitrarily in  $\Lambda$ 
4: for  $t = 1$  to  $T$  do
5:   Call positive response oracle for the standard RL with scalar reward  $r = -\lambda_t \cdot \mathbf{z}$ :
      $\pi_t \leftarrow \text{PosPlan}(\lambda_t)$ 
6:   Call the estimation oracle to approximate long-term measurement for  $\pi_t$ :
      $\hat{\mathbf{z}}_t \leftarrow \text{Est}(\pi_t)$ 
7:   Update using online gradient descent with the loss function  $\ell_t(\lambda) = -\lambda \cdot \hat{\mathbf{z}}_t$ :
      $\lambda_{t+1} \leftarrow \Gamma_{\Lambda}(\lambda_t + \eta \hat{\mathbf{z}}_t)$ 
8:   if  $\ell_t(\lambda_t) < -(\epsilon_0 + \epsilon_1)$  then
9:     return problem is infeasible
10:  end if
11: end for
12: return  $\bar{\mu}$ , a uniform mixture over  $\pi_1, \dots, \pi_T$ 

```

---

### D.1 Proof of Theorem 3.4

**Lemma D.1.** *If the problem is feasible, then for  $t = 1, 2, \dots, T$  we have*

$$\ell_t(\lambda_t) = -\lambda_t \cdot \hat{\mathbf{z}}_t \geq -(\epsilon_0 + \epsilon_1).$$

*Proof.* If the problem is feasible, then there exists  $\mu^*$  such that  $\bar{\mathbf{z}}(\mu^*) \in \mathcal{C}$ . Since all  $\lambda_t \in \mathcal{C}^\circ$ , they all have non-positive inner product with every point in  $\mathcal{C}$  including  $\bar{\mathbf{z}}(\mu^*)$ . Since  $-\lambda_t \cdot \bar{\mathbf{z}}(\mu^*) \geq 0$ , we can conclude that  $\max_{\pi \in \Pi} R(\pi) = \max_{\pi \in \Pi} -\lambda_t \cdot \bar{\mathbf{z}}(\pi) \geq 0$ . Therefore, by our guarantee for the positive response oracle,

$$R(\pi_t) = -\lambda_t \cdot \bar{\mathbf{z}}(\pi_t) \geq -\epsilon_0.$$

Now using Eq. (26) and the fact that  $\|\lambda_t\| \leq 1$ , we have

$$(-\lambda_t \cdot \hat{\mathbf{z}}_t) + \epsilon_1 \geq -\lambda_t \cdot \bar{\mathbf{z}}(\pi_t).$$

Combining completes the proof.  $\square$

The proof of Theorem 3.4 is similar to that of Theorem 3.3. If the algorithm reports infeasibility then the problem is infeasible as a result of Lemma D.1. Otherwise, we have

$$\frac{1}{T} \sum_{t=1}^T (\ell_t(\lambda_t) + \epsilon_1 + \epsilon_0) \geq 0,$$

which can be combined with Eq. (29) as before. Continuing this argument as before yields

$$\text{dist}(\bar{\mathbf{z}}(\mu), \mathcal{C}) \leq \left( \frac{B}{1-\gamma} + \epsilon_1 \right) T^{-1/2} + 2\epsilon_1 + \epsilon_0,$$

completing the proof.

### E Proof of Lemma 3.5

Let  $\mathcal{C}' = \mathcal{C} \times \{\kappa\}$  and  $\mathbf{q}$  be the projection of  $\tilde{\mathbf{x}} = \mathbf{x} \oplus \langle \kappa \rangle$  onto  $\tilde{\mathcal{C}} = \text{cone}(\mathcal{C}')$ , i.e.,

$$\mathbf{q} = \arg \min_{\mathbf{y} \in \tilde{\mathcal{C}}} \|\tilde{\mathbf{x}} - \mathbf{y}\|.$$

Let  $r$  be the last coordinate of  $\mathbf{q}$ . We prove the lemma in cases based on the value of  $r$  (which cannot be negative by construction).

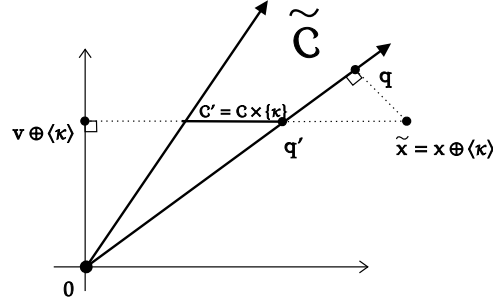

(a)  $r > \kappa$

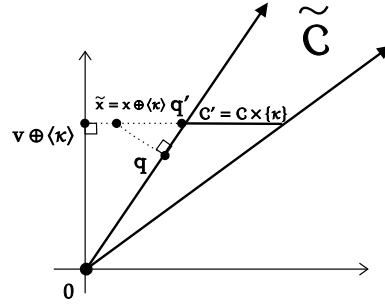

(b)  $0 < r < \kappa$

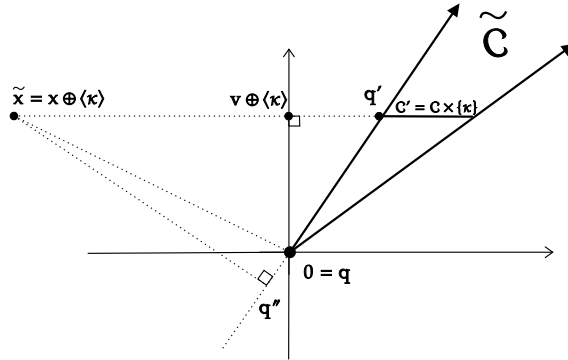

(c)  $r = 0$

Figure 3: Geometric Interpretation of the proof of Lemma 3.5

**Case 1** ( $r > \kappa$ ): Since  $\mathbf{q} \in \text{cone}(\mathcal{C}')$  with  $r > 0$ , there exists  $\alpha > 0$  and  $\mathbf{q}' \in \mathcal{C}'$  so that  $\mathbf{q} = \alpha \mathbf{q}'$ . See Figure 3a. Consider the plane defined by the three points  $\tilde{\mathbf{x}}, \mathbf{q}, \mathbf{q}'$ . Since the origin  $\mathbf{0}$  is on the line passing through  $\mathbf{q}$  and  $\mathbf{q}'$ , it must also be in this plane. Now consider the line that passes through  $\tilde{\mathbf{x}}$  and  $\mathbf{q}'$ . Note that all points on this line have last coordinate equal to  $\kappa$ , and they are all also in the aforementioned plane. Let  $\mathbf{v} \oplus \langle \kappa \rangle$  be the projection of  $\mathbf{0}$  onto this line ( $\mathbf{v} \in \mathbb{R}^d$ ).

Note that the two triangles  $\Delta(\tilde{\mathbf{x}}, \mathbf{q}, \mathbf{q}')$  and  $\Delta(\mathbf{0}, \mathbf{v} \oplus \langle \kappa \rangle, \mathbf{q}')$  are similar since they are right triangles with opposite angles at  $\mathbf{q}'$ . Therefore, by triangle similarity,

$$\frac{\|\mathbf{q}'\|}{\|\mathbf{v} \oplus \langle \kappa \rangle\|} = \frac{\|\tilde{\mathbf{x}} - \mathbf{q}'\|}{\|\tilde{\mathbf{x}} - \mathbf{q}\|} \geq \frac{\text{dist}(\tilde{\mathbf{x}}, \mathcal{C}')}{\text{dist}(\tilde{\mathbf{x}}, \tilde{\mathcal{C}})} = \frac{\text{dist}(\mathbf{x}, \mathcal{C})}{\text{dist}(\tilde{\mathbf{x}}, \tilde{\mathcal{C}})}.$$

Since  $\mathbf{q}' \in \mathcal{C}'$ , we have  $\|\mathbf{q}'\| \leq \sqrt{(\max_{\mathbf{x} \in \mathcal{C}} \|\mathbf{x}\|)^2 + \kappa^2}$ , resulting in

$$\frac{\|\mathbf{q}'\|}{\|\mathbf{v} \oplus \langle \kappa \rangle\|} \leq \frac{\sqrt{(\max_{\mathbf{x} \in \mathcal{C}} \|\mathbf{x}\|)^2 + \kappa^2}}{\kappa} = \sqrt{1 + 2\delta} \leq 1 + \delta$$

by the choice of  $\kappa$  given in the lemma. Combining completes the proof for this case.

**Case 2** ( $r = \kappa$ ): Since  $\mathbf{q} \in \text{cone}(\mathcal{C}')$  with  $\kappa$  as last coordinate, we have  $\mathbf{q} \in \mathcal{C}'$ . Thus,

$$\text{dist}(\mathbf{x}, \mathcal{C}) = \text{dist}(\tilde{\mathbf{x}}, \mathcal{C}') \leq \|\tilde{\mathbf{x}} - \mathbf{q}\| = \text{dist}(\tilde{\mathbf{x}}, \tilde{\mathcal{C}})$$

which completes the proof for this case.

**Case 3** ( $0 < r < \kappa$ ): The proof for this case is formally identical to that of Case 1, except that, in this case, the two triangles  $\Delta(\tilde{\mathbf{x}}, \mathbf{q}, \mathbf{q}')$  and  $\Delta(\mathbf{0}, \mathbf{v} \oplus \langle \kappa \rangle, \mathbf{q}')$  are now similar as a result of being right triangles with a shared angle at  $\mathbf{q}'$ . See Figure 3b.

**Case 4** ( $r = 0$ ): Since  $\mathbf{q} \in \text{cone}(\mathcal{C}')$ ,  $\mathbf{q}$  must have been generated by multiplying some  $\alpha \geq 0$  by some point in  $\mathcal{C}'$ . Since all points in  $\mathcal{C}'$  have last coordinate equal to  $\kappa > 0$ , and since  $r = 0$ , it must be the case that  $\alpha = 0$ , and thus,  $\mathbf{q} = \mathbf{0}$ . Let  $\mathbf{q}'$  be the projection of  $\tilde{\mathbf{x}}$  onto  $\mathcal{C}'$ . See Figure 3c. Consider the plane defined by the three points  $\tilde{\mathbf{x}}, \mathbf{q} = \mathbf{0}, \mathbf{q}'$ . Let  $\mathbf{q}''$  be the projection of  $\tilde{\mathbf{x}}$  onto the line passing through  $\mathbf{q}$  and  $\mathbf{q}'$ . Then

$$\|\tilde{\mathbf{x}} - \mathbf{q}''\| \leq \|\tilde{\mathbf{x}}\| = \text{dist}(\tilde{\mathbf{x}}, \tilde{\mathcal{C}}).$$

Now consider the line passing through  $\tilde{\mathbf{x}}$  and  $\mathbf{q}'$ . Note that all points on this line have last coordinate equal to  $\kappa$  and are also in the aforementioned plane. Let  $\mathbf{v} \oplus \langle \kappa \rangle$  be the projection of  $\mathbf{0}$  onto this line ( $\mathbf{v} \in \mathbb{R}^d$ ). Note that the two triangles  $\Delta(\tilde{\mathbf{x}}, \mathbf{q}'', \mathbf{q}')$  and  $\Delta(\mathbf{0}, \mathbf{v} \oplus \langle \kappa \rangle, \mathbf{q}')$  are similar since they are right triangles with a shared angle at  $\mathbf{q}'$ . Therefore, by triangle similarity,

$$\frac{\|\mathbf{q}'\|}{\|\mathbf{v} \oplus \langle \kappa \rangle\|} = \frac{\|\tilde{\mathbf{x}} - \mathbf{q}'\|}{\|\tilde{\mathbf{x}} - \mathbf{q}''\|} \geq \frac{\text{dist}(\tilde{\mathbf{x}}, \mathcal{C}')}{\text{dist}(\tilde{\mathbf{x}}, \tilde{\mathcal{C}})} = \frac{\text{dist}(\mathbf{x}, \mathcal{C})}{\text{dist}(\tilde{\mathbf{x}}, \tilde{\mathcal{C}})}.$$

The rest of the proof for this case is exactly as in Case 1.

## F Additional experimental details

All the models were trained using the following hyperparameters: policy network consists of 2-layer fully-connected MLP with ReLU activation and 128 hidden units and a A2C learning rate of  $10^{-2}$ . For APPROP, the constant  $\kappa$  (§3.3) is set to be 20. In the following figures, the performance of the algorithms has been depicted using different hyperparameters; showing average and standard deviation over 25 runs.

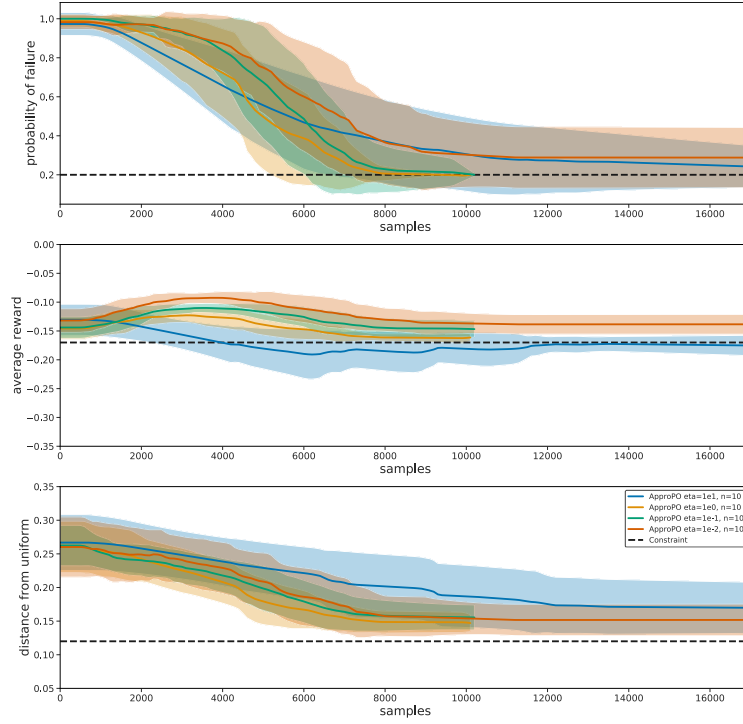

(a)  $n = 10$

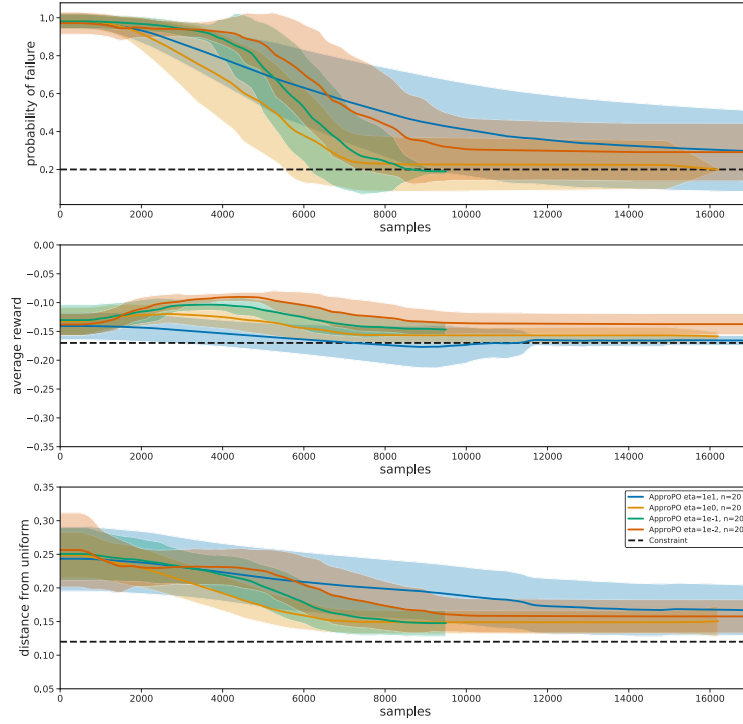

(b)  $n = 20$

Figure 4: Performance of APPROPO using different hyperparameters. The two numbers are learning rate for the online learning algorithm and  $n$  (§3.4) respectively. In all figures, the x-axis is number samples. The vertical axes correspond to the three constraints, with thresholds shown as a dashed line; for reward (middle) this is a lower bound; for the others it is an upper bound.

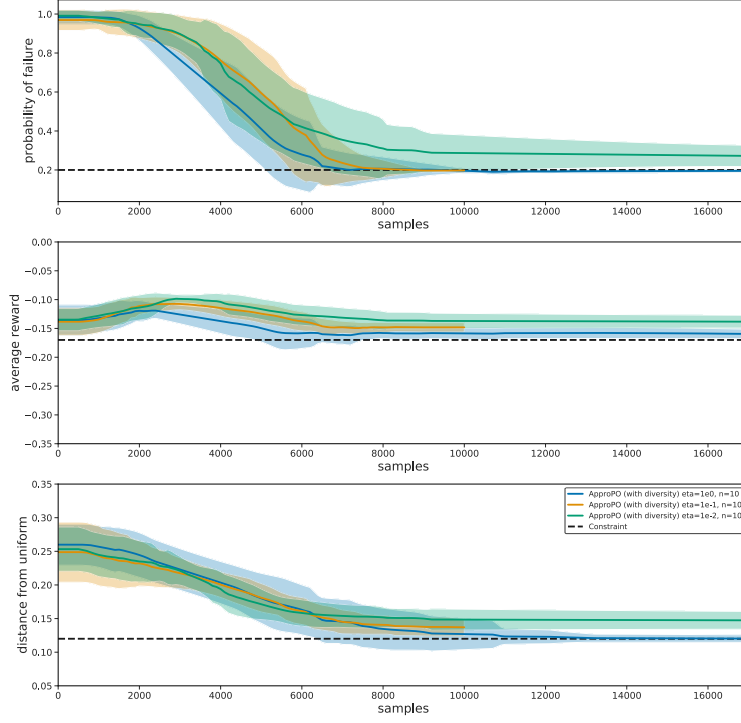

(a)  $n = 10$

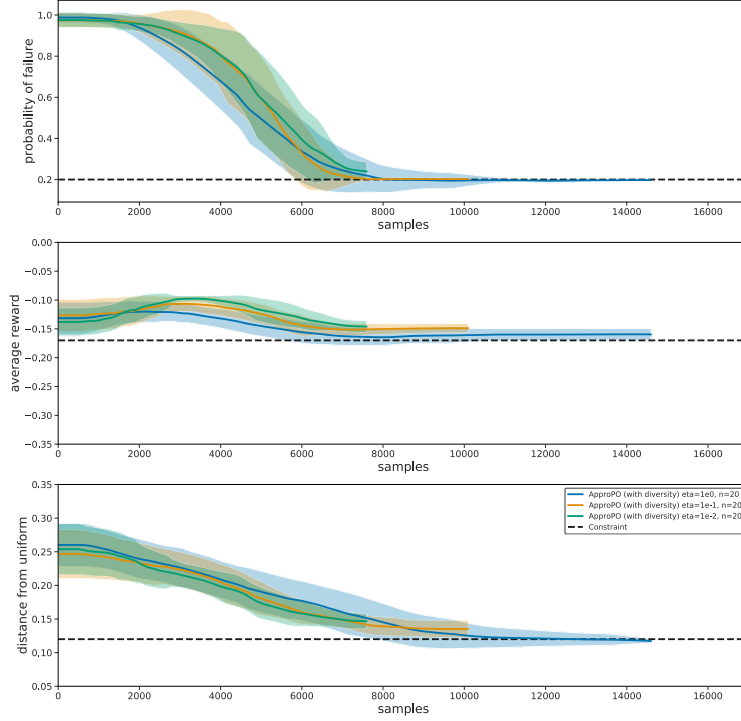

(b)  $n = 20$

Figure 5: Performance of APPROPO with diversity constraints using different hyperparameters. The two numbers are learning rate for the online learning algorithm and  $n$  (§3.4) respectively. In all figures, the x-axis is number samples. The vertical axes correspond to the three constraints, with thresholds shown as a dashed line; for reward (middle) this is a lower bound; for the others it is an upper bound.

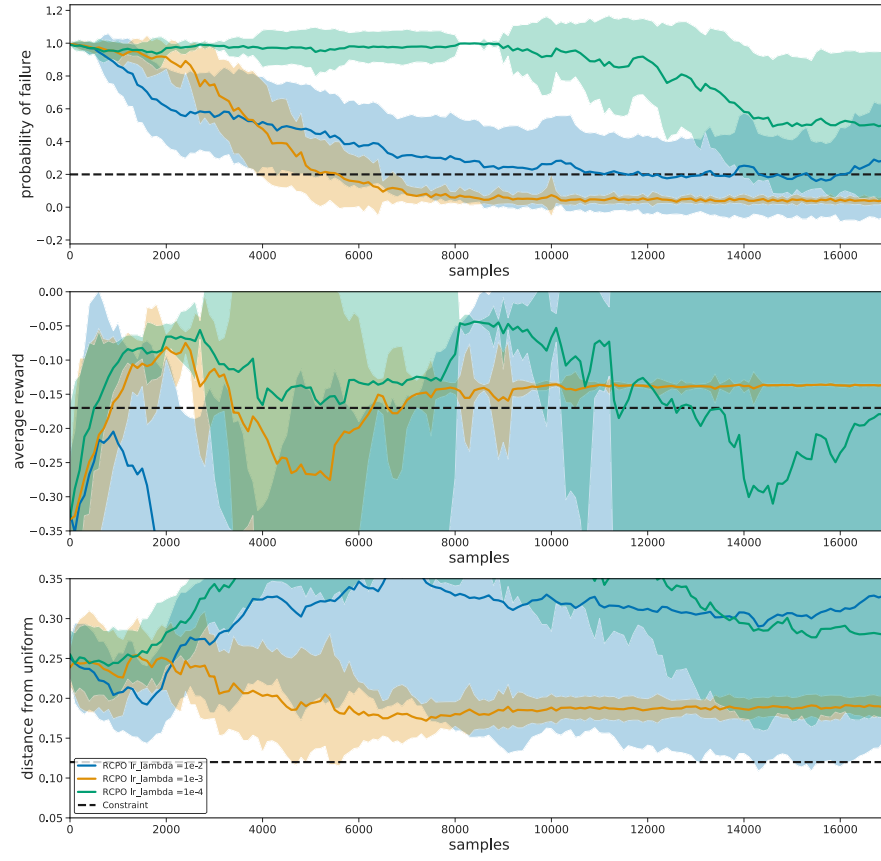

Figure 6: Performance of RCPO using different learning rates for Lagrange multiplier. In all figures, the x-axis is number samples. The vertical axes correspond to the three constraints, with thresholds shown as a dashed line; for reward (middle) this is a lower bound; for the others it is an upper bound.
